# Supplementary material for: SU-101: a Bi(iii)-based metal–organic framework as an efficient heterogeneous catalyst for the CO2 cycloaddition reaction
Source: Royal Society of Chemistry journal article supplement (doi:10.1039/d3dt01743e), 2023-01-01
Supplement: d3dt01743e1.pdf [file d3dt01743e1.pdf]

Supporting Information for:

## **SU-101: A Bi(III)-based Metal-Organic Framework as an efficient heterogeneous catalyst for the CO<sub>2</sub> cycloaddition reaction**

Juan L. Obeso,<sup>a,b+</sup> J. Gabriel Flores,<sup>c,d+</sup> Catalina V. Flores,<sup>a,b</sup> Valeria B. López-Cervantes,<sup>b</sup> V. Martínez-Jiménez,<sup>c</sup> José Antonio de los Reyes,<sup>c</sup> Enrique Lima,<sup>b</sup> Diego Solis-Ibarra,<sup>b</sup> Ilich A. Ibarra,<sup>b\*</sup> Carolina Leyva<sup>a\*</sup> and Ricardo A. Peralta<sup>e\*</sup>

<sup>a</sup>Instituto Politécnico Nacional, CICATA U. Legaria, Laboratorio Nacional de Ciencia, Tecnología y Gestión Integrada del Agua (LNAgua), Legaria 694, Irrigación, 11500, Miguel Hidalgo, CDMX, México.

<sup>b</sup>Laboratorio de Fisicoquímica y Reactividad de Superficies (LaFReS), Instituto de Investigaciones en Materiales, Universidad Nacional Autónoma de México, Circuito Exterior s/n, CU, Coyoacán, 04510, Ciudad de México, México.

<sup>c</sup>Departamento de Ingeniería de Procesos e Hidráulica, División de Ciencias Básicas e Ingeniería, Universidad Autónoma Metropolitana-Iztapalapa, 09340, Ciudad de México, México.

<sup>d</sup>Área de Química Aplicada, Departamento de Ciencias Básicas, Universidad Autónoma Metropolitana-Azcapotzalco, 02200, Ciudad de México, México.

<sup>e</sup>Departamento de Química, División de Ciencias Básicas e Ingeniería. Universidad Autónoma Metropolitana (UAM-I), 09340, México

<sup>+</sup> These authors contributed equally to this manuscript.

**Table of contents**

**S1. Experimental details.....S3**  
**S2. Results and Discussions .....S4**

## **S1. Experimental details**

### **Analytical instruments**

#### **Powder X-Ray Diffraction Patterns (PXRD)**

The PXRD was recorded on a Rigaku Diffractometer, Ultima IV, with Cu-K $\alpha$ 1 radiation ( $\lambda = 1.5406 \text{ \AA}$ ) using a nickel filter. The patterns were recorded in the range  $2\text{--}50^\circ 2\theta$  with a step scan of  $0.02^\circ$  and a scan rate of  $0.05^\circ \text{ min}^{-1}$ .

#### **Fourier-transform infrared spectroscopy (FT-IR)**

The FT-IR spectra were obtained in the range of  $4000\text{--}500 \text{ cm}^{-1}$  on a Shimadzu IRTracer-100 spectrometer using KBr pellets.

#### **Thermal gravimetric analysis (TGA)**

The TGA was performed using a TA Instruments Q500HR analyzer under an N $_2$  atmosphere using the high-resolution mode (dynamic rate TGA) at a scan rate of  $5^\circ \text{ C min}^{-1}$ , from room temperature to  $800^\circ \text{ C}$ .

#### **Nitrogen adsorption-desorption**

Nitrogen adsorption-desorption isotherms were measured by a volumetric method using a Micromeritics ASAP 2020 gas sorption analyzer. The sample mass was 65.0 mg. Free space correction measurements were performed using ultra-high purity He gas (UHP grade 5, 99.999% pure). Nitrogen isotherms were measured using UHP-grade Nitrogen. All nitrogen analyses were performed using a liquid nitrogen bath at 77 K. Oil-free vacuum pumps were used to prevent contamination of the sample or feed gases.

#### **Nuclear Magnetic Resonance (NMR).**

NMR spectra were recorded in CDCl $_3$  solution on a Bruker Avance 400 MHz, working at 400 MHz and 100 MHz for  $^1\text{H}$  and  $^{13}\text{C}$ , respectively.

## S2. Characterization techniques and results

### Synthesis of SU-101

#### PXRD

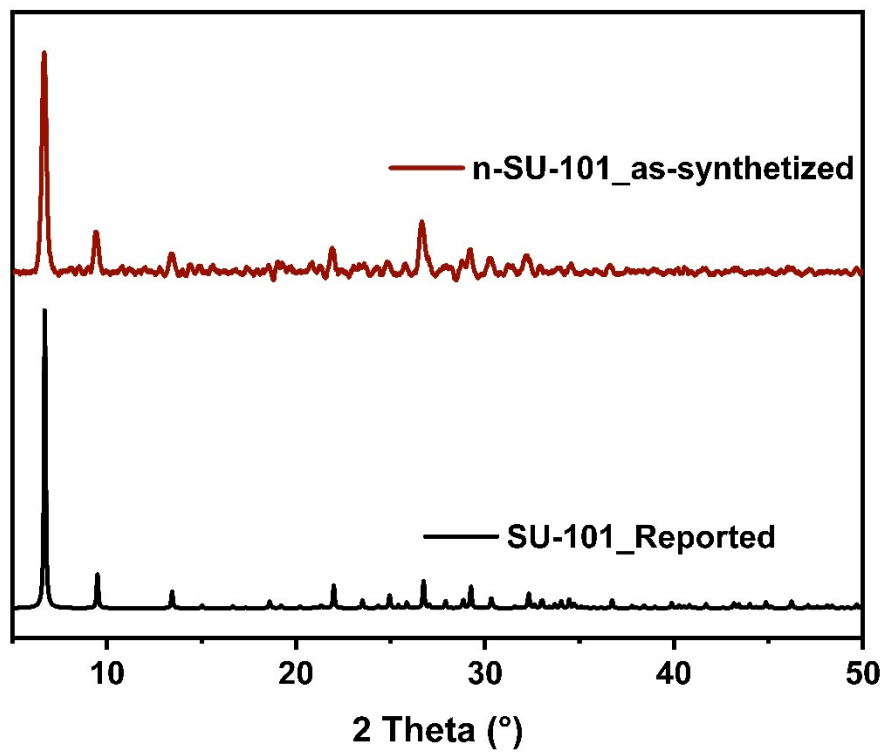

**Figure S1.** PXRD pattern of SU-101 reported, and SU-101 as-synthesized.

## FTIR

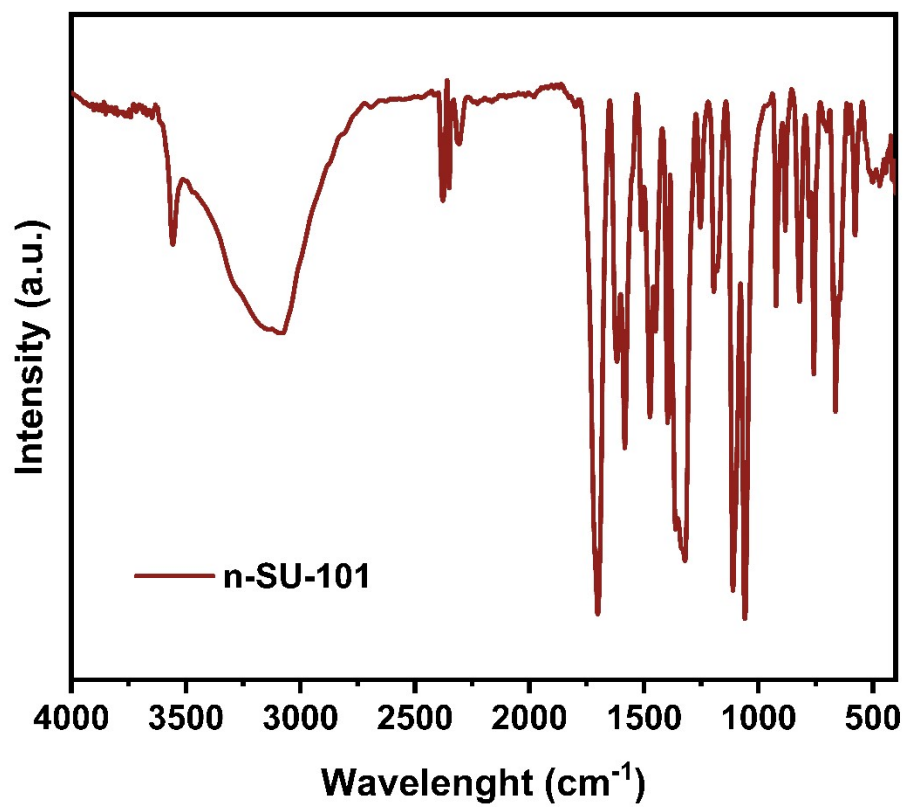

**Figure S2.** FTIR spectra of n-SU-101 as-synthesized.

## TGA

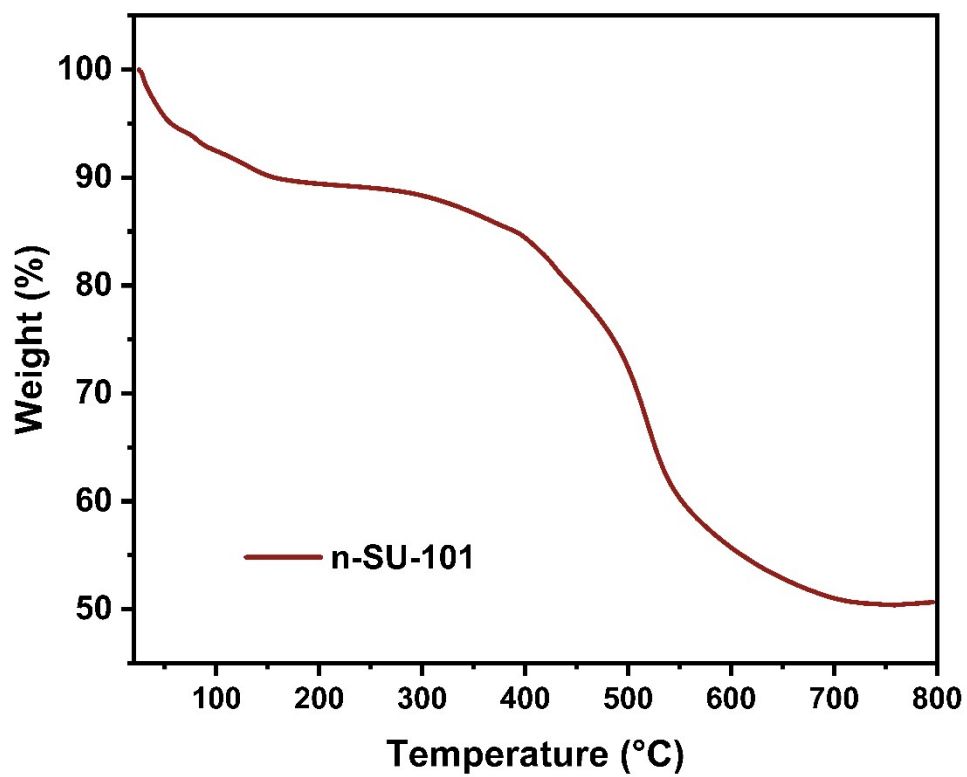

Figure S3. TGA analysis profile of SU-101 as-synthesized.

## Nitrogen adsorption-desorption

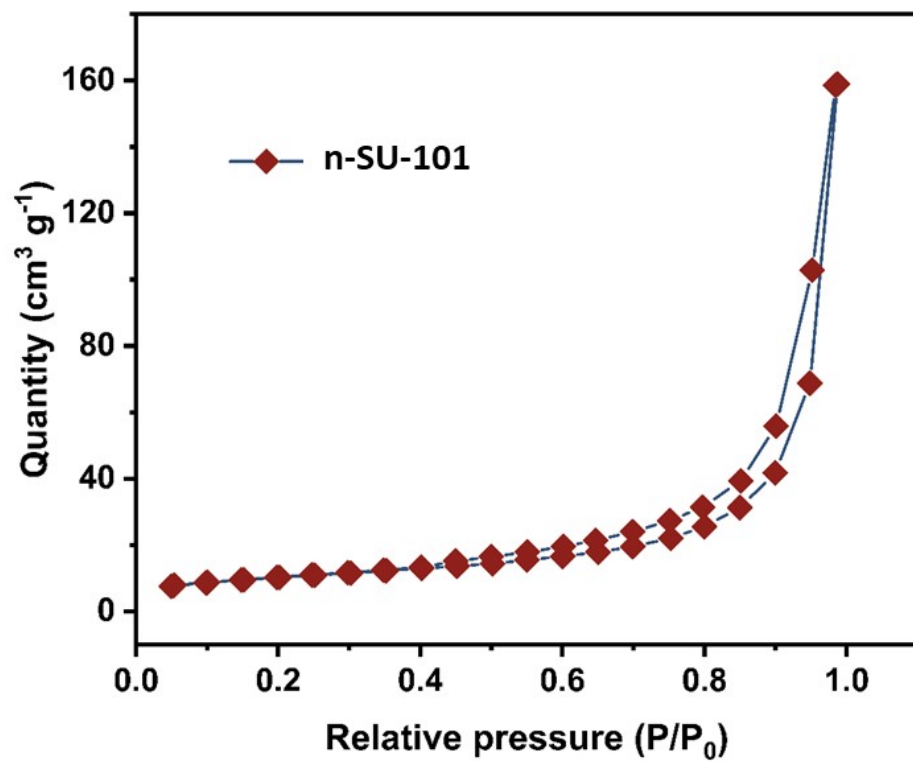

**Figure S4.** Nitrogen isotherm of SU-101 as-synthesized.

## Pore size distribution

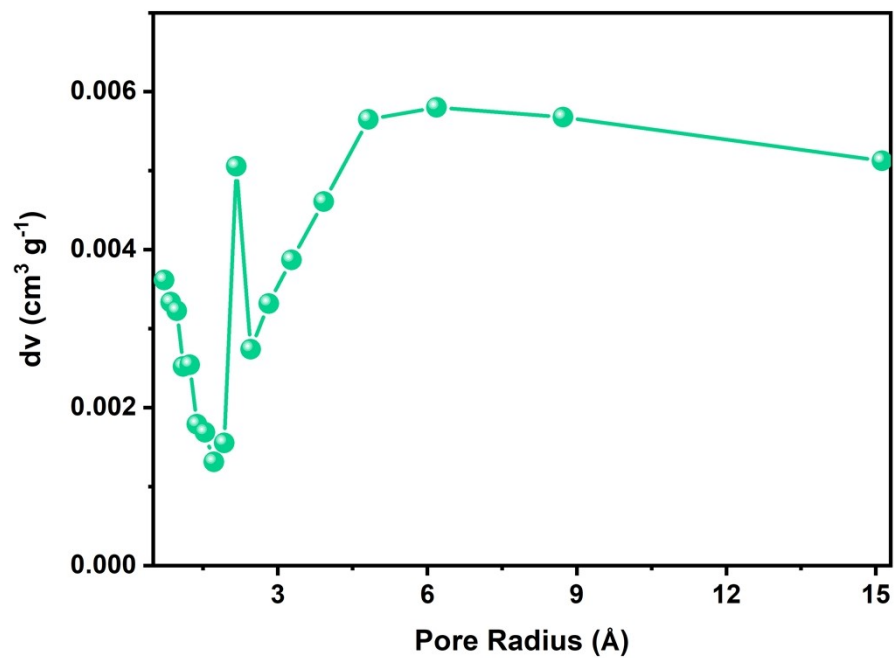

Figure S5. BJH pore size distribution plot derived from the N<sub>2</sub> isotherm.



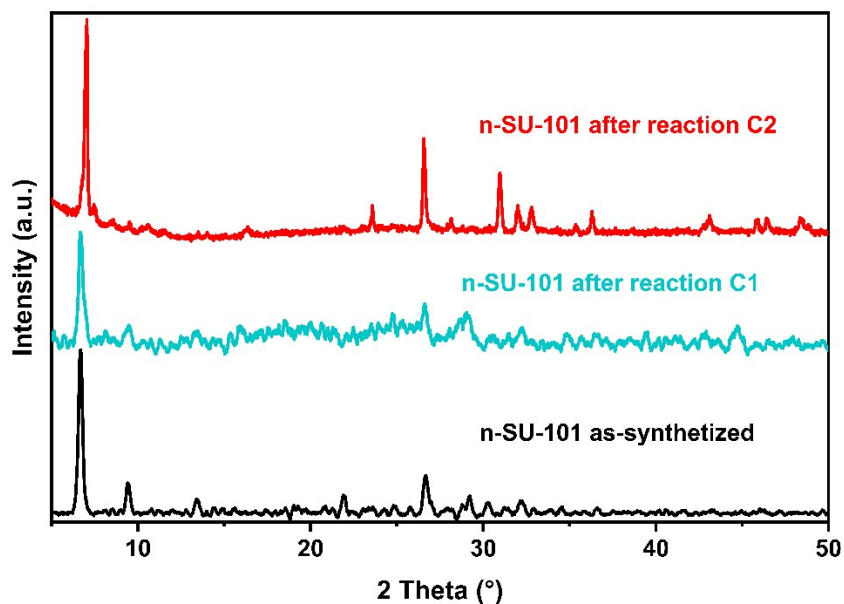

**Figure S6.** PXRD pattern of SU-101 as-synthesized (Black) after one reaction cycle (blue) and after two reaction cycles (red).

### Reaction product characterization

4-phenyl-1, 3-dioxolan-2-one was characterized by  $^1\text{H-NMR}$  and  $^{13}\text{C-NMR}$  spectroscopy

4-phenyl-1, 3-dioxolan-2-one

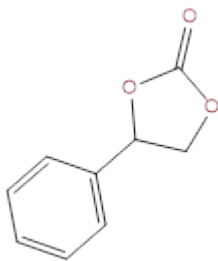

$^1\text{H-NMR}$  (400 MHz,  $\text{CDCl}_3$ )  $\delta$  7.46-7.28 (m, 5H), 5.66 (t, 1H), 4.78 (t, 1H), 4.35-4.32 (m, 1H)  $^{13}\text{C-NMR}$  (101 MHz,  $\text{CDCl}_3$ )  $\delta$  154.82 (s), 137.67 (s), 129.70 (s), 128.19 (s), 125.53 (s), 77.97 (s), 71.20 (s).

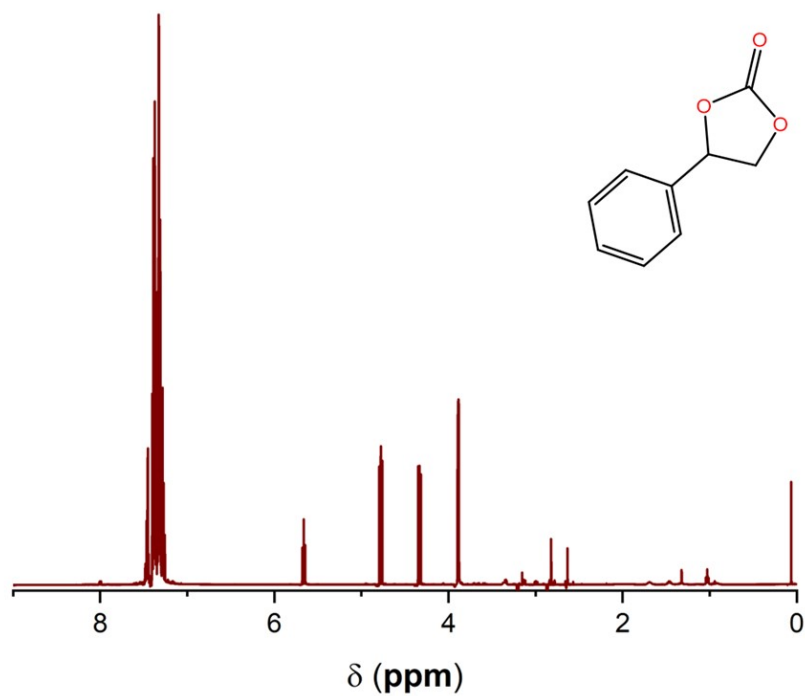

Figure S7. The <sup>1</sup>H-NMR spectrum of 4-phenyl-1, 3-dioxolan-2-one

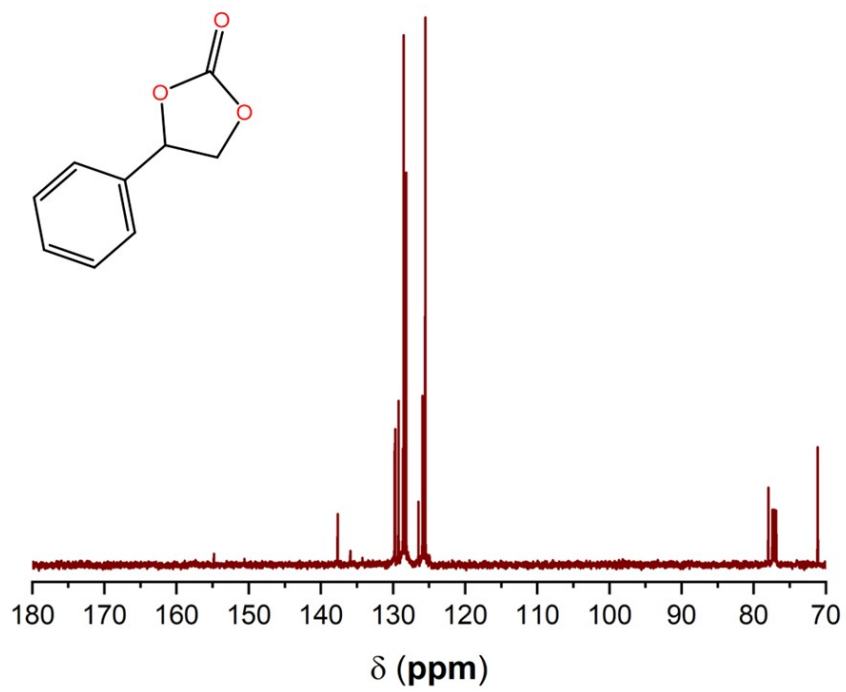

Figure S8. The <sup>13</sup>C-NMR spectrum of 4-phenyl-1, 3-dioxolan-2-one
